# Supplementary material for: Dual regulation of TxNIP by ChREBP and FoxO1 in liver
Source: PubMed Central journal article supplement — iScience. 2021 Feb 20;24(3):102218. doi: 10.1016/j.isci.2021.102218 (PMC7966993; doi:10.1016/j.isci.2021.102218), 2021-02-20
Supplement: mmc1.pdf [file mmc1.pdf]

**iScience, Volume 24**

## **Supplemental information**

### **Dual regulation of TxNIP**

#### **by ChREBP and FoxO1 in liver**

**Benedicte Noblet, Fadila Benhamed, InSug O-Sullivan, Wenwei Zhang, Gaëlle Filhoulaud, Alexandra Montagner, Arnaud Polizzi, Solenne Marmier, Anne-Françoise Burnol, Sandra Guilmeau, Tarik Issad, Hervé Guillou, Catherine Bernard, Terry Unterman, and Catherine Postic**

**Figure S1. *Txnip* silencing in liver reduces blood glucose concentrations in C57BL/6J mice. Related to Figure 8.**

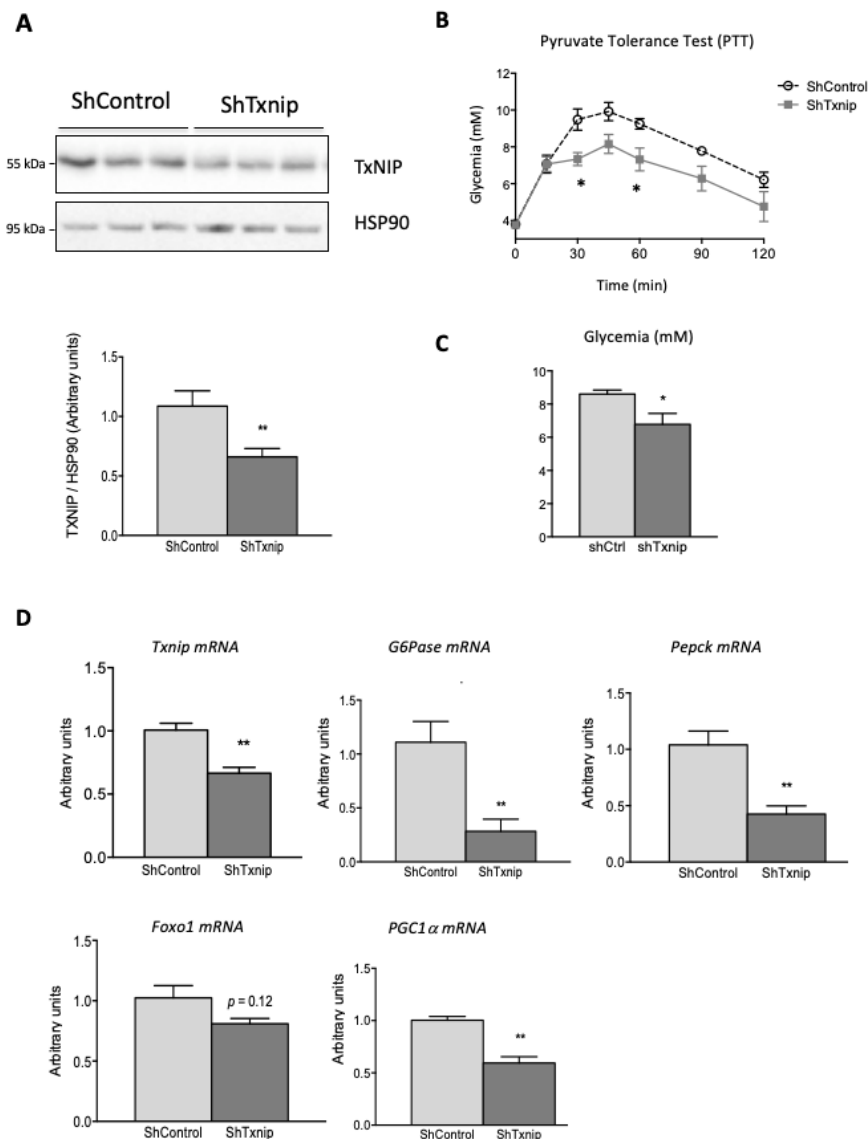

Adult C57BL/6J male mice were injected intravenously with a single dose of  $5.10^9$  pfu of ShControl or ShTxnip adenovirus (GeneCust) at Day1. Seven days later, mice were challenged to a pyruvate tolerance test (PTT). Data are expressed as means  $\pm$  SEM, n=6 to 8 individual mice/group. Significance is based on two-way ANOVA followed by Bonferroni post hoc test, \* $p < 0.05$ , \*\* $p < 0.01$ , when compared to ShControl (A) Pyruvate tolerance test (PTT) (C). Blood glucose concentrations at sacrifice. (D). qPCR analysis of *Txnip*, *G6Pase*, *Pepck*, *Foxo* and *PGC1α*.

**Table S1. Sequences of PCR primers used for mutagenesis. Related to Figure 2.**

|                                  | <b>Forward Primer</b>                             | <b>Reverse Primer</b>               |
|----------------------------------|---------------------------------------------------|-------------------------------------|
| <b>ChoRE<sub>a</sub> WT</b>      | CTG TGC <u>ACG AGG</u> GCT <u>GCA CGA</u> GCC TCC | GGA GGC TCG TGC AGC CCT CGT GCA CAG |
| <b>ChoRE<sub>a</sub> mutated</b> | CTG TGC ACC ATG GCT GGA CGA GCC TCC               | GGA GGC TCG TCC AGC CAT GGT GCA CAG |
| <b>IRE WT</b>                    | AGG CCT <u>GGT AAA CAA GGG</u> CCA AGT A          | TAC TTG GCC CTT GTT TAC CAG GCC T   |
| <b>IRE partial mutant 1</b>      | AGG CCT AGT AAC CAA GGG CCA AGT A                 | TAC TTG GCC CTT GGT TAC TAG GCC T   |
| <b>IRE partial mutant 2</b>      | AGG TCT AGC AAC CAA GGG CCA AGT A                 | TAC TTG GCC CTT GGT TGC TAG ACC T   |
| <b>IRE mutated</b>               | AGG TCT AGC AAC CAA TGG CCA AGT A                 | TAC TTG GCC ATT GGT TGC TAG ACC T   |

The consensus sequences for recognition and binding of the transcription factors ChREBP and FoxO1 are underlined. The sequences of the endogenous promoter (murine-WT) are indicated for comparison. Mutations are indicated in red. The 'IRE partial mutant 1' mutant serves as a template for obtaining the 'IRE mutated' (last lane). Abbreviations: ChoRE<sub>a</sub>, Carbohydrate Response Element proximal to the *Txnip* promoter; IRE, Insulin Response Element; WT, unmutated wild type promoter.

**Table S2. Sequences of the primers used for qPCR and ChIP-qPCR. Related to Figures 1, 3, 4, 5, 6, 7, 8 and S1.**

|                    | Forward                         | Reverse                         |
|--------------------|---------------------------------|---------------------------------|
| Acc                | GAG GTG GCT AAG AGG AGG CTC T   | CAG CAC CGA GAC TGA ACT GTA AGG |
| Chrebp total       | ATG ACC CCT CAC TCA GGG AAT A   | GAT CCA AGG GTC CAG AGC AG      |
| Chrebp $\alpha$    | CGA CAC TCA CCC ACC TCT TC      | TTG TTC AGC CGG ATC TTG TC      |
| Chrebp $\beta$     | TCT GCA GAT CGC GTG GAG         | CTT GTC CCG GCA TAG CAA C       |
| Foxo1              | TGT TAC TTA GCT CTC TCC CCT CG  | AGA CGA GCA GTG GCT CAA T       |
| Foxo1 (TGN)        | GGA TGG TGA AGA GCG TGC CC      | CGC TCT TGC CTC CCT CTG GA      |
| Foxo3              | CTCTCAGGCTCCTCACTGTA            | ATGAGTTCACTACGGATGAT            |
| G6Pase             | TTA CCA GCC TCC TGT CGG         | GAC ACA ACT GAA GCC GGT TAG     |
| Lpk                | CTT GCT CTA CCG TGA GCC TC      | ACC ACA ATC ACC AGA TCA CC      |
| Txnip              | GAC TAG AGA GCC CCA CCA CC      | GGA CGC ACG GAT CCA CCT CA      |
| Igfbp1             | CCT GCC AAC GAG AAC TCT AT      | AGG GAT TTT CTT TCC ACT CC      |
| Pepck              | TGG CTA CGT CCC TAA GGA A       | GGT CCT CCA GAT ACT TGT CGA     |
| Cyclophilin        | ATG GCA CTG GTG GCA AGT CC      | TTG CCA TTC CTG GAC CCA AA      |
| Tbp                | CCC CAC AAC TCT TCC ATT CT      | GCA GGA GTG ATA GGG GTC AT      |
| Chore <i>Lpk</i>   | GTC CCA CAC TTT GGA AGC AT      | CCC CAA CAC TGA TTC TAC CC      |
| Chore <i>Txnip</i> | AAG GGC CAA GTA GCC AAT GGG     | GTG CTG GCC TGG AGG             |
| IRE <i>Pepck</i>   | TAC AGA CAT TAT CTA GAA GTC TCA | CAA GGG CAG GCC TAG CCG AGA     |
| IRE <i>Txnip</i>   | AAC AAC AAC CAT TTT CCC CGC TAG | ATA GCC GCC TGG CTT GGC GCT     |

**Table S3. Antibodies and dilutions used for Western Blot analysis. Related to Figures 1, 3, 4, 5, 7, 8 and S1.**

| <b>Protein</b> | <b>Size (kDa)</b> | <b>Dilution (solution)</b> | <b>Secondary</b> | <b>Reference</b>       |
|----------------|-------------------|----------------------------|------------------|------------------------|
| <b>ACC</b>     | 265               | 1/5000 (BSA 5%)            | Rabbit           | Cell Signaling (#3662) |
| <b>ChREBP</b>  | 93                | 1/3000 (BSA 5%)            | Rabbit           | Nouvs (Nb400-135)      |
| <b>FoxO1</b>   | 70                | 1/1000 (BSA 5%)            | Rabbit           | Cell Signaling (#2880) |
| <b>GAPDH</b>   | 36                | 1/2000 (lait 5%)           | Rabbit           | Santa Cruz (sc-25778)  |
| <b>HSP90</b>   | 85                | 1/1000 (lait 5%)           | Rabbit           | Cell Signaling (#4874) |
| <b>L-PK</b>    | 62                | 1/300 (BSA 2%)             | Rabbit           | Dr A. Kahn (Cochin)    |
| <b>PEPCK</b>   | 69                | 1/2000 (lait 5%)           | Rabbit           | Santa Cruz (sc-32879)  |
| <b>©FoxO1</b>  | 70                | 1/800 (BSA 5%)             | Rabbit           | Cell Signaling (#9461) |
| <b>TxNIP</b>   | 44                | 1/2000 (lait 5%)           | Mice             | MBL (K0205-3)          |

## Transparent Methods

### Animals

Ten to twelve week-old adult male C57BL/6J, *db/db*, *Chrebp*<sup>+/+</sup> and *Chrebp*<sup>-/-</sup> (Iroz et al., 2017), transgenic mice overexpressing a constitutively active form of FoxO1 in liver (FoxO1<sup>TGN</sup>) (Zhang et al., 2006), liver specific triple FoxO1, 3, 4 knockout (LFoxO<sup>TKO</sup>) (Zhang et al., 2016), liver specific insulin receptor knockout (LIR<sup>KO</sup>) and liver specific insulin receptor and FoxO1 double knockout (LIRFox01<sup>KO</sup>) (O-Sullivan et al., 2015) mice were used for *in vitro* and *in vivo* experiments as indicated. Procedures were carried out according to the French guidelines for the care and use of experimental animals (Animal authorization agreement n° CEEA34.AFB/CP.082.12, Paris Descartes Ethical Committee). Mice were maintained in a 12-hour light/dark cycle with water and standard diet (65% carbohydrate, 11% fat, and 24% protein) unless specified.

### Nutritional and circadian challenges

Mice were studied in the fasted, fed or refed state. ZT stands for Zeitgeber time: ZT0 is defined as the time when the lights are turned on and ZT12 as the time when lights are turned off (7 pm). The fed group was fed ad libitum. The fasted group was fasted from ZT0 until ZT12. The refed group was fasted from ZT0 to ZT12 (included) and refed from ZT12 to ZT24. For circadian rhythms experiments, mice were killed by cervical dislocation at several time points in a pair-wise manner: ZT0, ZT4, ZT8, ZT12, ZT14, ZT16, ZT20, ZT24 as indicated. Liver was removed, snap-frozen in liquid nitrogen and stored at -80 °C until use.

### Primary cultures of mouse hepatocytes

Mouse hepatocytes were isolated as described (Dentin et al., 2004). Briefly, hepatocytes were isolated from the livers of fed male mice by a modification of the collagenase method (Berry and Friend, 1969). Briefly, livers from mice were perfused with Hank's balanced salt solution (HBSS, KCl, 5.4 mm; KH<sub>2</sub>PO<sub>4</sub>, 0.45 mm; NaCl, 138 mm; NaHCO<sub>3</sub>, 4.2 mm; Na<sub>2</sub>HPO<sub>4</sub>, 0.34 mm; glucose, 5.5 mm; HEPES, 1 m; EGTA, 50 mm; CaCl<sub>2</sub>, 50 mm; pH 7.4). Livers were washed at a rate of 5 ml/min using the portal vein before collagenase (0.025%) was added. Cell viability was assessed by the trypan blue exclusion test and was always higher than 60%. Hepatocytes were seeded (in 60-mm Petri dishes at a density of 2 × 10<sup>6</sup> cells for RNA extraction or 6-well plates at a density of 4 × 10<sup>5</sup> cells per well for luciferase assays) in medium M199 with Earle salts (Invitrogen), supplemented with 10 µg/ml of streptomycin, 100 units/ml of

penicillin, 2.4 mM of glutamine, 0.1% (w/v) bovine serum albumin, 2% (v/v) Ultrocser G (Invitrogen), 100 nM dexamethasone (Soludecadron, Merck Sharp), and 100 nM insulin (Actrapid, Novo-Nordisk). After cell attachment (6 h), the medium was replaced by fresh M199 medium for 24 h. For adenoviral infections, hepatocytes from C57BL/6J male mice were incubated under low glucose concentration (5 mM) with specific adenovirus (from 0.1 to 3 pfu/cell) for 24 h. For glucose stimulation experiments, hepatocytes from *Chrebp*<sup>+/+</sup> and *Chrebp*<sup>-/-</sup> mice (Iroz et al., 2017) were incubated in the presence of low (5mM) or high glucose concentrations (25 mM) for 24 hours.

### **Adenoviral injection *in vivo***

To silence TxNIP expression, adult C57BL/6J (+/+) and *db/db* male mice were injected intravenously with a single dose of 5.0x10<sup>9</sup> pfu of ShControl or ShTxnip adenovirus (GeneCust) at Day1. At Day 4, fasting blood glucose was measured. At Day 7, mice were challenged with a pyruvate tolerance test (PTT). At Day 8, fed blood glucose concentrations were measured. Mice were sacrificed under fasting conditions. To silence ChREBP, adult C57BL/6J male mice were injected with a single dose of 5.0x10<sup>9</sup> pfu of ShControl or ShChREBP adenovirus (GeneCust) at Day1. Seven days later, mice were challenged to nutritional manipulations as indicated (Fasted or Refed) before sacrifice.

### **Pyruvate tolerance test**

Intraperitoneal pyruvate tolerance test (PTT, 2g/kg body weight) was performed in overnight fasted awake adult C57BL/6J (+/+) and *db/db* mice 7 days post adenovirus injection.

### **Mutagenesis and Luciferase assays**

A TxNIP promoter-luciferase reporter plasmid (pGL3B-1081) was obtained from Addgene (cat #18758). Hepatocytes from C57BL/6J male mice were plated in 6-well plates (4 × 10<sup>5</sup> cells per well) and transfected with TxNIP luciferase reporter constructs (0.2 μg DNA per well) including either Wild type or mutated on the ChoRE (ChoREa mutated) or on the IRE (IRE mutated) (Yu et al., 2009) using Lipofectamine 2000 (Invitrogen, Carlsbad, CA). Mutants were generated using oligonucleotides described in Table S1. The luciferase assay was conducted using the dual luciferase substrate system (E1501; Promega, Madison, WI), and the result was normalized with the internal control Beta galactosidase. Each experiment was performed in triplicate and repeated 5 to 8 times as indicated.

### **ChIP analysis**

*In vivo* ChIP assays from mouse livers were performed as described (Marmier et al., 2015). Briefly, genomic DNA regions of interest were isolated using antibodies against ChREBP (Novus) or FoxO1 (Cell Signaling) or non-immune IgG as a control (Cell Signaling). QPCR reactions were carried out in triplicate using SYBR Green Supermix (Bio-Rad) on a CFX Connect™ Real Time PCR system. Positive and negative control sites were tested for each factor as well as the sites of interest. The resulting signals were normalized for primer efficiency by carrying out qPCR for each primer pair using input DNA (pooled unprecipitated genomic DNA from each sample). DNA fragments were quantified by qPCR, using primers described in Table S2. Results are expressed as fold enrichment.

### **Gene expression analysis**

Total cellular RNA was extracted using the SV total RNA isolation system (Promega). For qPCR analysis, total RNA samples (2 µg) were reversed transcribed using the High Capacity cDNA Reverse Transcription Kit (Applied Biosystems). Primers for SYBR Green assays are presented in Table S2. Amplifications were performed on an ABI Prism 7300 Real Time PCR System (Applied Biosystems). qPCR data were normalized by TATA-box binding protein (TBP) mRNA levels and analyzed with LinRegPCR.22.

### **Western blotting analysis**

Proteins from liver lysates were subjected to 10% SDS-PAGE gel electrophoresis and transferred to nitrocellulose membranes. Antibodies and dilutions used are indicated in Table S3.

### **Wheat germ agglutinin purification**

For ChREBP immunoprecipitation, cells were lysed on IPH buffer (20 mmol/L Tris/HCl, 150 mmol/L NaCl, 0.5% NP-40 [v/v], and protease inhibitors) as described (Guinez et al., 2011). Briefly, proteins were incubated with 2 µg of anti-ChREBP antibody (Novus) and placed at 4°C overnight. Bound proteins were recovered after addition of 30 µl of Sepharose-labeled protein G (Sigma) for 1 h at 4°C. Beads were gently centrifuged for 1 min and washed four times for 5 min each. For wheat germ agglutinin ([WGA] a GlcNAc-binding lectin) precipitation, 1 mg of proteins was incubated with 30 µl of WGA agarose beads (Sigma). Then, proteins were eluted from the beads in a Laemmli buffer and separated by SDS-PAGE.



### **Biochemical analysis**

Blood glucose was measured in total blood using an Accu-Check glucometer (Roche).

### **Statistical Analysis**

Data representing at least three independent experiments are reported as means  $\pm$  S.E.M, and were analyzed using Prism 5.0, GraphPad) software. A student's T-test was used when comparing two groups (followed by Mann-Whitney post hoc test) or two-way ANOVA when comparing three or more groups followed by a Bonferroni post hoc test. Statistical significance was defined as  $p < 0.05$ .

## Supplemental References

- Berry, M.N., and Friend, D.S. (1969). High-yield preparation of isolated rat liver parenchymal cells: a biochemical and fine structural study. *J. Cell Biol.* *43*, 506-520.
- Dentin, R., Pégurier, J.P., Benhamed, F., Foufelle, F., Ferré, P., Fauveau, V., Magnuson, M.A., Girard, J., and Postic, C (2004). Hepatic glucokinase is required for the synergistic action of ChREBP and SREBP-1c on glycolytic and lipogenic gene expression. *J Biol Chem.* *279*, 20314–20326.
- Guinez, C., Filhoulaud, G., Rayah-Benhamed, F., Marmier, S., Dubuquoy, C., Dentin, R., Moldes, M., Burnol, A.F., Yang, X., Lefebvre, T., et al. (2011) O-GlcNAcylation increases ChREBP protein content and transcriptional activity in the liver. *Diabetes.* *60*, 1399–1413.
- Iroz, A., Montagner, A., Benhamed, F., Levavasseur, F., Polizzi, A., Anthony, E., Régnier, M., Fouché, E., Lukowicz, C., Cauzac, M., et al. (2017). A Specific ChREBP and PPAR $\alpha$  Cross-Talk Is Required for the Glucose-Mediated FGF21 Response. *Cell Rep.* *21*, 403–416.
- Marmier, S., Dentin, R., Daujat-Chavanieu, M., Guillou, H., Bertrand-Michel, J., Gerbal-Chaloin, S., Girard, J., Lotersztajn, S., and Postic, C. (2015). Novel role for carbohydrate responsive element binding protein in the control of ethanol metabolism and susceptibility to binge drinking. *Hepatology* *62*, 1086-100.
- O-Sullivan, I., Zhang, W., Wasserman, D.H., Liew, C.W., Liu, J., Paik, J., DePinho, R.A., Stolz, D.B., Kahn, C.R., Schwartz, M.W., and Unterman, T.G. (2015). FoxO1 integrates direct and indirect effects of insulin on hepatic glucose production and glucose utilization *Nat Commun.* *6*, 7861.
- Yu, F.X., and Luo, Y. Tandem ChoRE and CCAAT motifs and associated factors regulate Txnip expression in response to glucose or adenosine-containing molecules. (2009). *PLoS One* *4*, e8397.
- Zhang, W., Patil, S., Chauhan, B., Guo, S., Powell, D.R., Le, J., Klotsas, A., Matika, R., Xiao, X., Franks, R., et al. (2006). FoxO1 regulates multiple metabolic pathways in the liver: effects on gluconeogenic, glycolytic, and lipogenic gene expression. *J Biol Chem.* *281*, 10105–10117.
- Zhang, W., Bu, S.Y., Mashek, M.T., O-Sullivan, I., Sibai, Z., Khan, S.A., Ilkayeva, O., Newgard, C.B., Mashek, D.G., and Unterman TG. Integrated Regulation of Hepatic Lipid and Glucose Metabolism by Adipose Triacylglycerol Lipase and FoxO Proteins (2016). *Cell Rep.* *15*, 349-359.
